# Supplementary material for: A novel CdS photocatalyst based on magnetic fly ash cenospheres as the carrier: performance and mechanism
Source: Royal Society of Chemistry journal article supplement (doi:10.1039/c4ra06593j), 2014-01-01
Supplement: c4ra06593j1.pdf [file c4ra06593j1.pdf]

### Supplementary Material

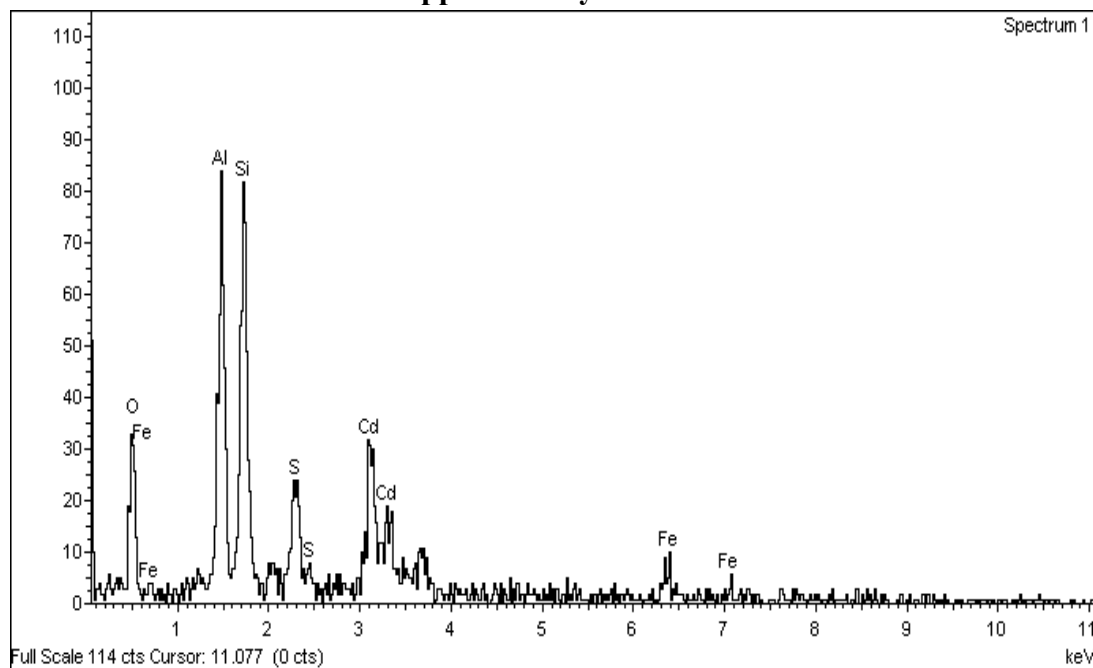

Fig. S1. EDS patterns of CdS-MFACs

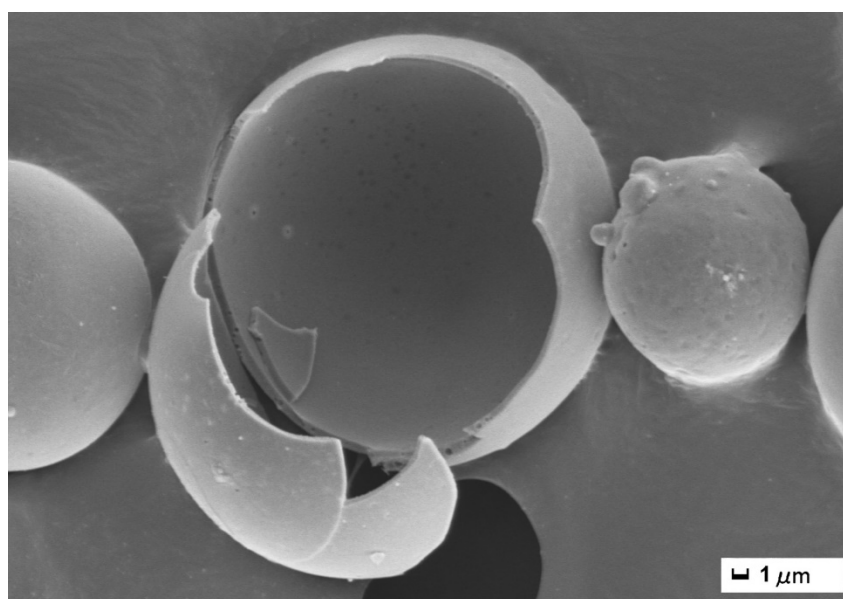

Fig. S2. SEM images of MFACs

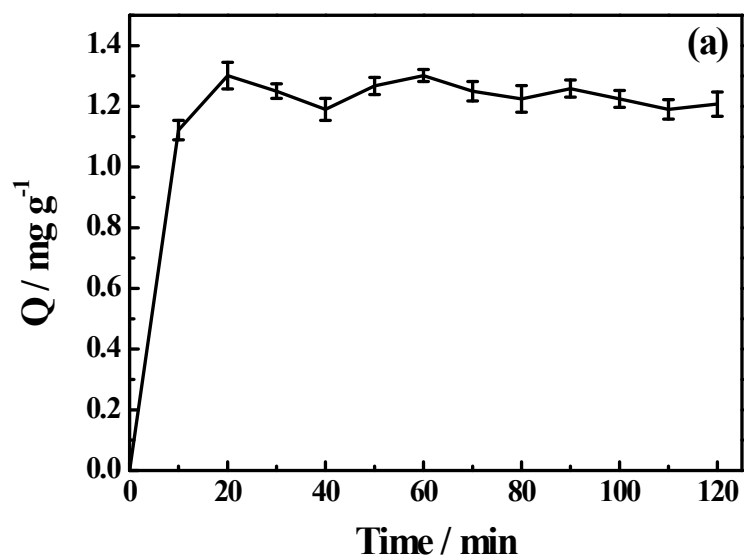

Fig. S3. Absorption spectra of the solution of danofloxacin mesylate under darkness in the presence of CdS/MFACs

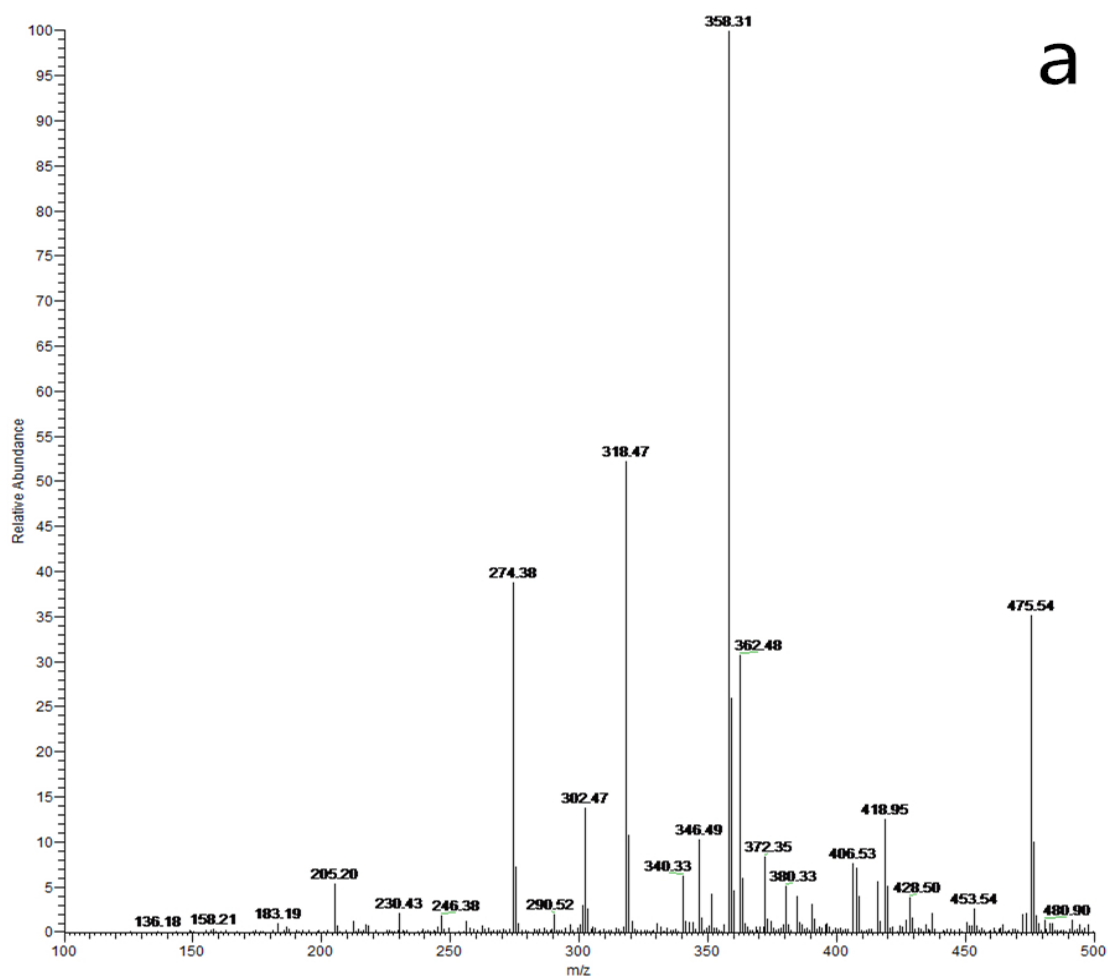

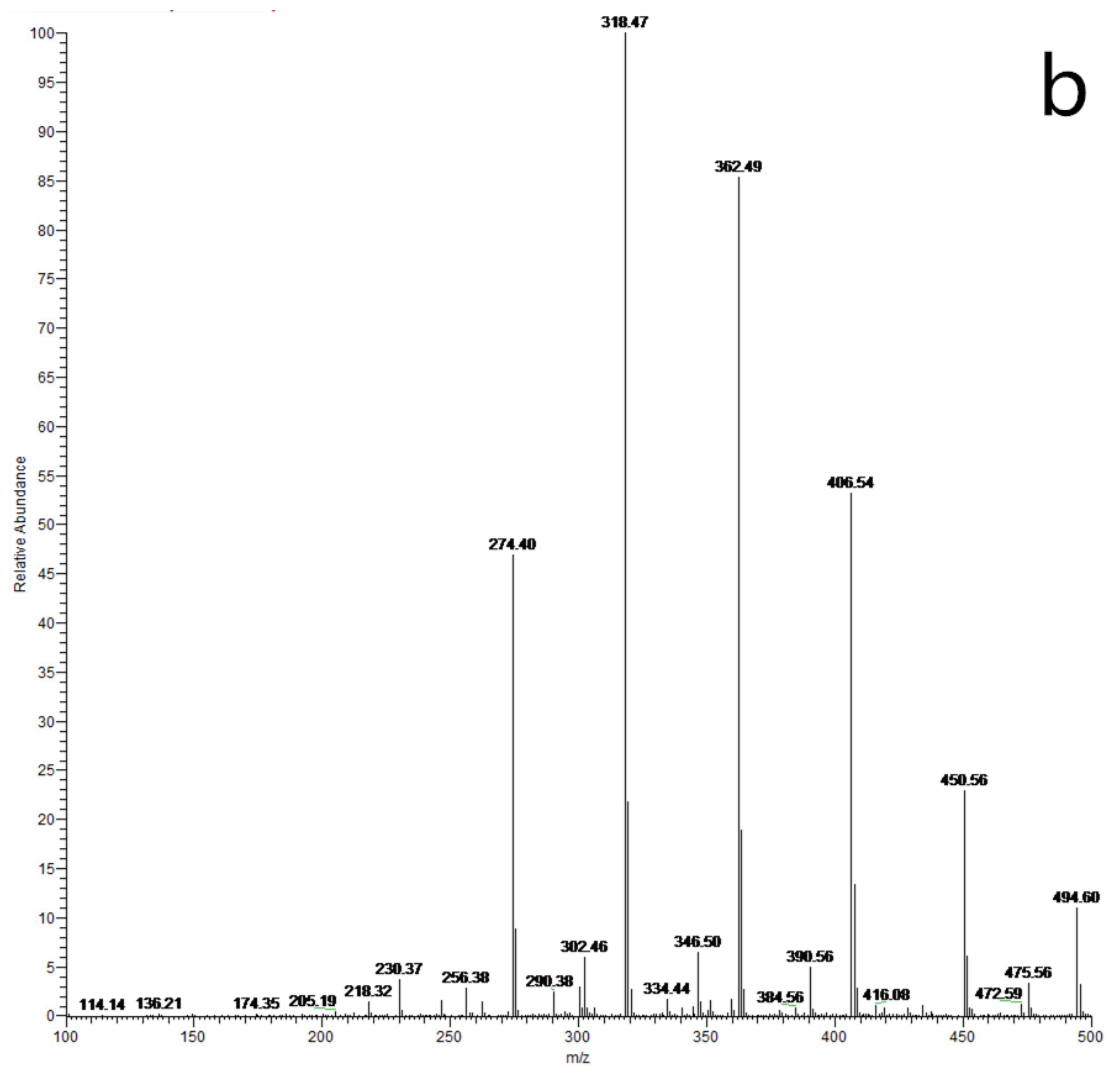

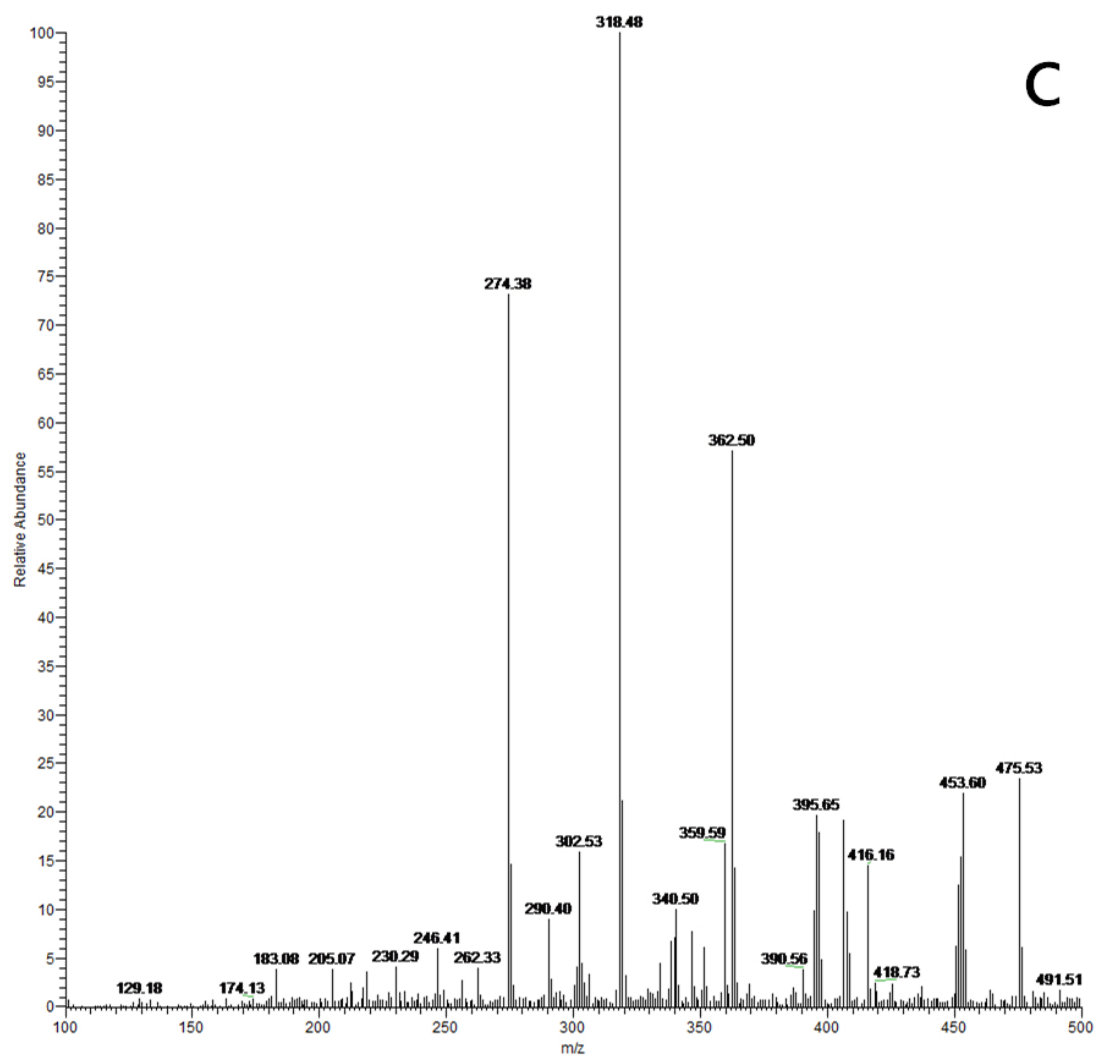

Fig. S4. MS spectra of photodegradation of danofloxacin mesylate with CdS-MFACs (a. the initial 20 mg/L danofloxacin mesylate solution, b. 30 min under the visible light irradiation, c. 60 min under the visible light irradiation)
